# Supplementary material
Source: Springer Nature journal article supplement (https://www.springermedizin.de/resource/supplementary/12911_2013_818_MOESM2_ESM.pdf/9526704)

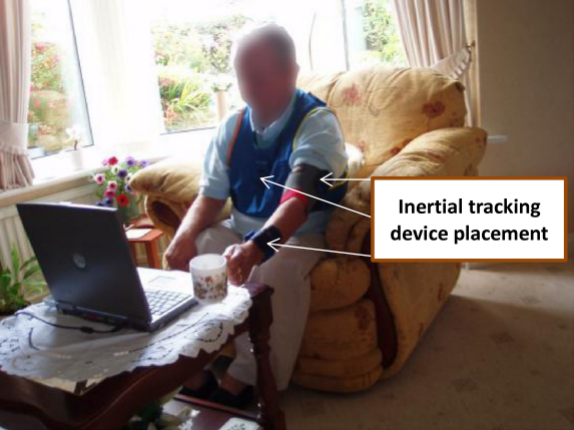

**Inertial tracking  
device placement**

Supplement: MOESM2 [file 9526704]
